# Supplementary material for: Reversal of the T cell immune system reveals the molecular basis for T cell lineage fate determination in the thymus
Source: PubMed Central journal article supplement (PMC9098387; doi:10.1038/s41590-022-01187-1), 2022-04-29

# Figure 3d

Top panel was used for "IP: CD4" and "Lysate".

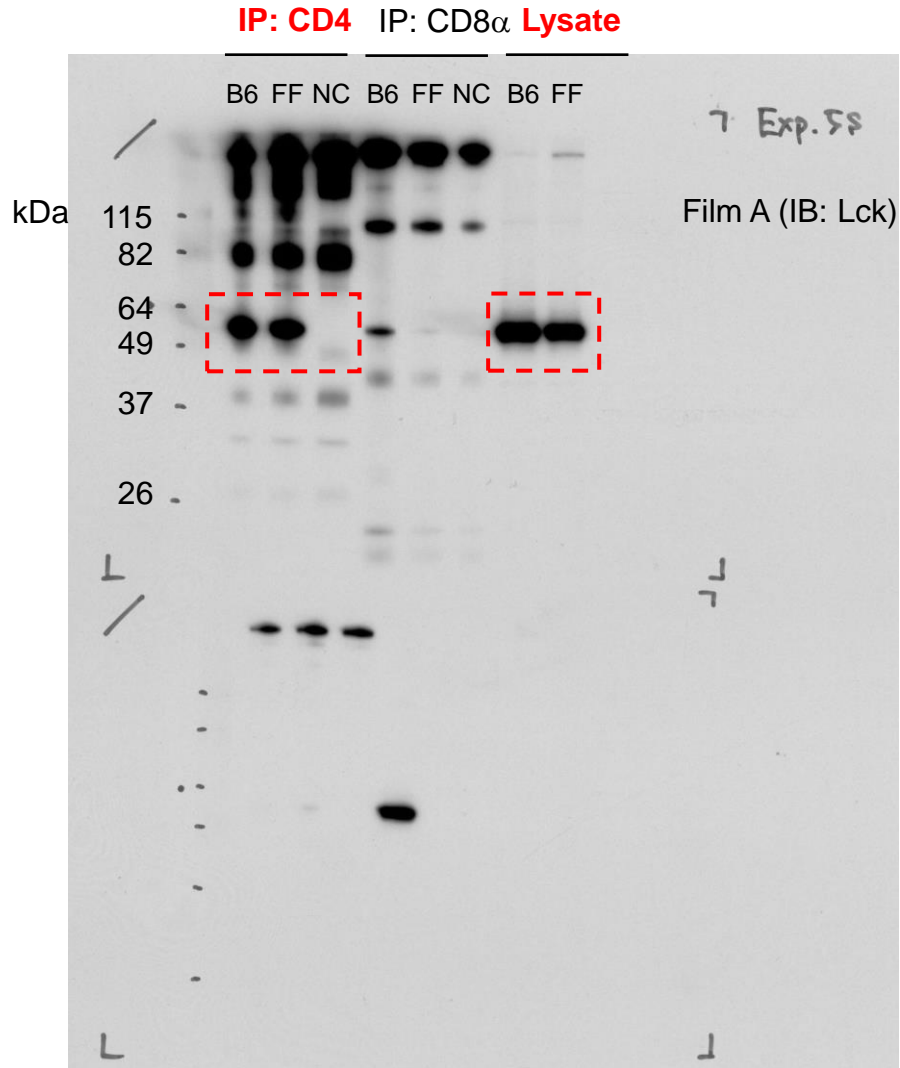

Top panel was used for "IP: CD8 $\alpha$ ".

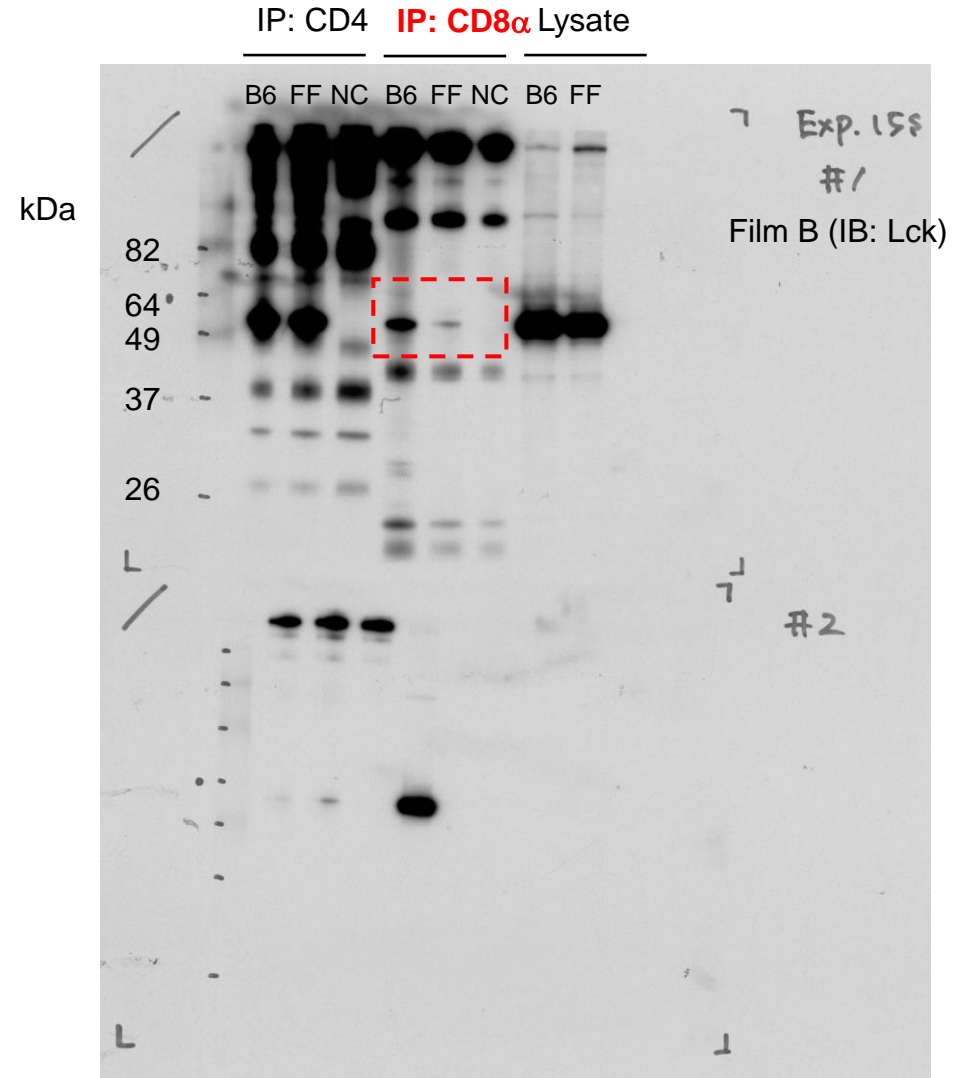

Supplement: 41590_2022_1187_MOESM2_ESM.pdf [file 41590_2022_1187_MOESM2_ESM.pdf]
